# Supplementary material
Source: publisher figshare collection journal article supplement (https://tandf.figshare.com/ndownloader/files/13240802)
Supplement: Supplementary file 1 [file 13240802]

Supplementary Table 1. Baseline characteristics of patients in two groups

| Characteristic | LP group  (n=246) | OC-LP group  (n=779) | *P* value |
| --- | --- | --- | --- |
| Female age (year) | 29(27-31) | 29(27-31) | 0.371 |
| Infertile duration (year) | 3(2-5) | 3(2-5) | 0.238 |
| BMI | 22.51(20.31-25.26) | 22.20(20.08-24.97) | 0.366 |
| PRL (mIu/L) | 275(200-376) | 265(201-349) | 0.697 |
| Base LH (IU/L) | 5.82(4.57-8.33) | 6.65(5.56-7.68) | 0.001 |
| Base FSH (IU/L) | 6.52(5.63-7.52) | 6.60(4.68-8.81) | 0.776 |
| Base E2 (pmol/L) | 137(95-182) | 141(99-192) | 0.010 |
| T (nmol/L) | 1.49(1.24-1.88) | 1.64(1.25-2.02) | 0.038 |
| Primary infertility (%) | 52.0%(128/246) | 58.4%(455/779) | 0.078 |
| Indication for ART |  |  | 0.834 |
| Tubal factor | 69.5%(171/246) | 70.3%(548/779) |  |
| Male factor | 7.7%(19/246) | 8.5%(66/779) |  |
| Others | 22.8%(56/246) | 21.2%(165/779) |  |

Abbreviations: BMI, body mass index; PRL, prolactin; LH, luteinizing hormone; FSH, follicle stimulation hormone; E2, estradiol; T, testosterone; ART, assisted reproductive technique.

Supplementary Table 2. Clinical and ART characteristics of two groups

| Characteristic | LP group  (n=246) | OC-LP group  (n=779) | *P* value |
| --- | --- | --- | --- |
| Desensitization day |  |  |  |
| AFC | 25(19-30) | 24(19-30) | 0.300 |
| LH (IU/L) | 2.37(1.74-3.35) | 1.61(1.13-2.29) | ＜0.001 |
| E2 (pmol/L) | 73(73-110) | 73(73-102) | 0.495 |
| P (nmol/L) | 1.70(1.04-2.82) | 1.90(1.15-2.71) | 0.426 |
| Trigger day |  |  |  |
| LH (IU/L) | 1.72(1.14-2.33) | 1.21(0.78-2.06) | ＜0.001 |
| E2 (pmol/L) | 11788(7118-16736) | 11221(7164-16911) | 0.975 |
| P (nmol/L) | 2.45(1.73-3.42) | 2.57(1.67-3.67) | 0.950 |
| En thickness (mm) | 11(10-13) | 10(9-12) | ＜0.001 |
| No. of follicle ≥14mm | 12(8-15) | 11(8-15) | 0.460 |
| Gonadotropin dosage (IU) | 1500(1175-1965) | 1400(1125-1875) | 0.179 |
| Stimulation days | 12(10-13) | 11(10-13) | 0.145 |
| No. of oocyte retrieved | 15(10-19) | 14(9-19) | 0.678 |
| No. of MⅡ oocyte | 13(8-17) | 13(8-18) | 0.986 |
| No. of fertilized oocyte | 9(5-13) | 9(6-13) | 0.622 |
| No. of cleaved embryo | 9(5-12) | 9(6-13) | 0.580 |
| No. of top quality embryo | 4(2-7) | 4(2-7) | 0.079 |

Abbreviations: AFC, antral follicle count; P, progesterone; En, endomtrium; MⅡ, Meta-phaseⅡ.
